# Supplementary material
Source: PubMed Central journal article supplement (PMC3989640)
Supplement: embj0033-0327-sd2.pdf [file embj0033-0327-sd2.pdf]

Figure S2 relates to Figure 2  
**Supplementary Figure 2**

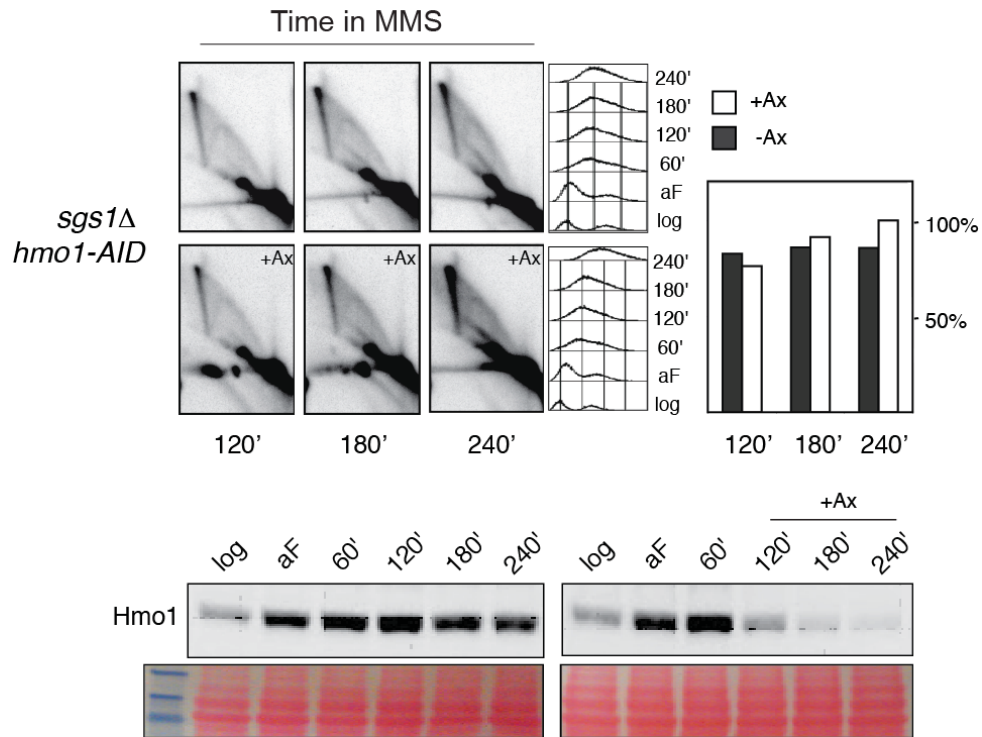

**Figure S2.** Hmo1 depletion does not interfere with the stability of SCJs formed during replication of damaged templates. 2D gel profile of replication intermediates of an *sgs1 hmo1-AID* conditional mutant (HY2176) following or not Hmo1 depletion by addition of auxin (Ax) 60 min after release from G1 arrest into YPD media containing 0.033% MMS. Also included are FACS profiles, X-molecule quantification and the western blot to control Hmo1 depletion, together with the Ponceau staining of samples as loading control. During quantification the highest value obtained for the X-molecules accumulating was considered as 100%.
