# Supplementary material
Source: PubMed Central journal article supplement (PMC3989640)
Supplement: embj0033-0327-sd5.pdf [file embj0033-0327-sd5.pdf]

Figure S5 relates to Figure 5

Supplementary Figure 5

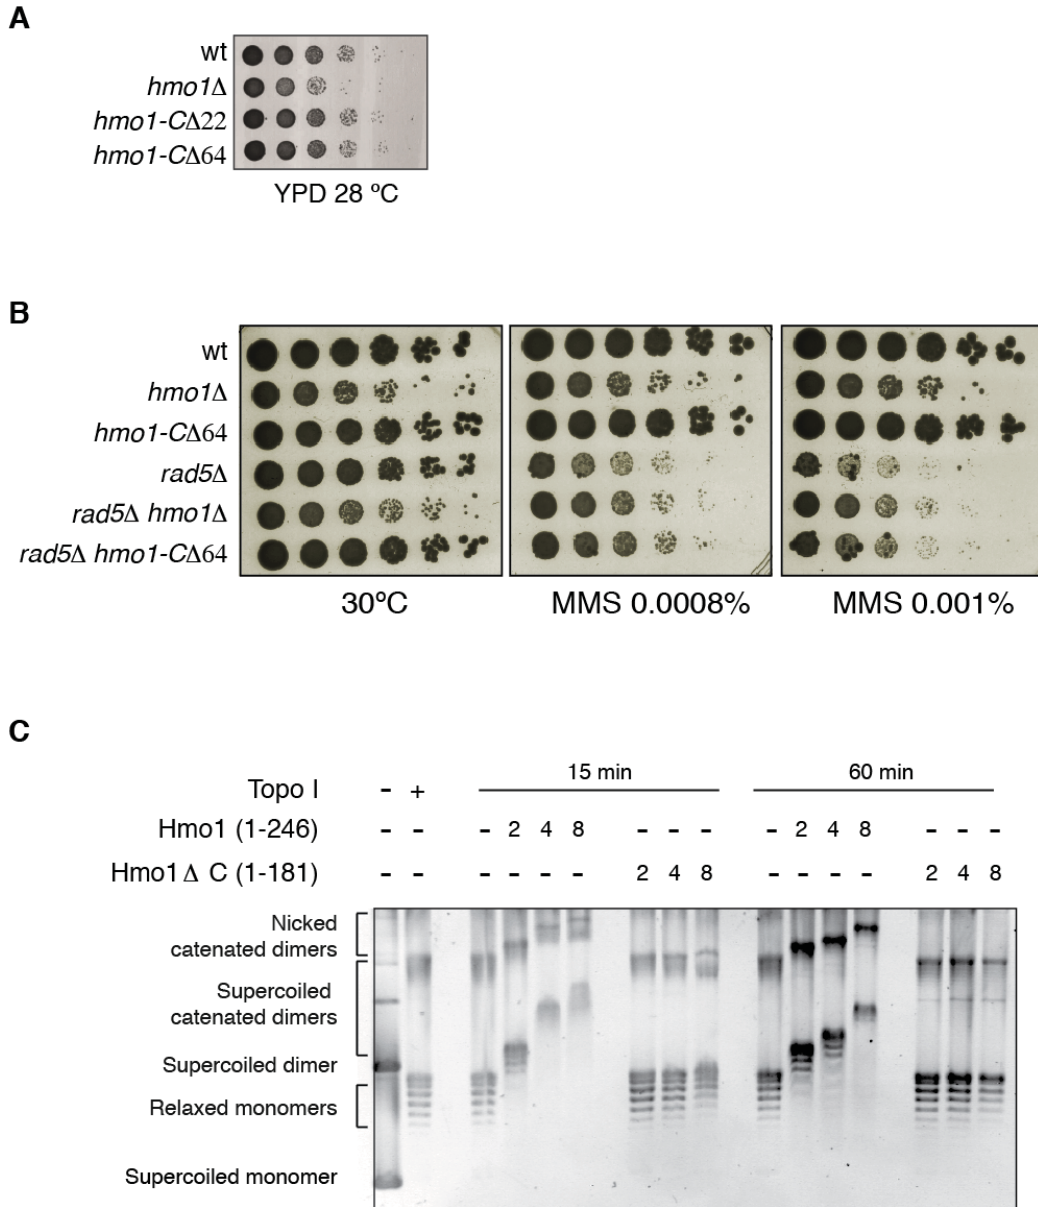

**Figure S5.** The C-terminal tail of Hmo1 is required for Hmo1-mediated Rad5 pathway activation in the presence of DNA damage and for promoting DNA catenation/hemicatenation *in vitro*. **(A)** Hmo1-C alleles show normal growth. wt (HY4103), *hmo1* (HY1508), *hmo1-C* 22 (HY4113) and *hmo1-C* 64 (HY4101) cells were spotted. **(B)** Hmo1 affects the Rad5 pathway via its C-terminal tail. wt (FY1296),

*hmo1* (HY3662), *hmo1-C 64* (HY3732), *rad5* (HY3664), *rad5 hmo1* (HY3632), *rad5 hmo1-C 64* (HY3735) strains were spotted. (C) Hmo1 alters DNA topology in a C-terminal tail-dependent manner. Following relaxation of 1  $\mu$ g of YIplac211 plasmid for 1 hour with wheat-germ topoisomerase I (TopoI), increasing amounts (2, 4 or 8  $\mu$ g) of full-length or C-terminally truncated Hmo1 proteins were added and the reaction was allowed to proceed for 15 or 60 min. The topoisomers were separated in a 0.6% agarose gel.
