# Supplementary material
Source: PubMed Central journal article supplement (PMC3989640)
Supplement: embj0033-0327-sd6.pdf [file embj0033-0327-sd6.pdf]

## Supplemental Experimental Procedures

Supplementary Materials include 1 table, 5 figures, extended experimental procedures, and references.

**Table S1. *Saccharomyces cerevisiae* strains used in this study.** The strains are listed in alphabetical/number ascending order order.

| Strain | Genotype                                                                                               | Source         |
|--------|--------------------------------------------------------------------------------------------------------|----------------|
| FY0090 | <i>MATa his3-200 leu2-3, 112 lys2-801 trp1-1 (am) ura3-52</i><br>(DF5 background, wt)                  | Lab collection |
| FY0108 | <i>MATa his3-200 leu2-3, 112 lys2-801 trp1-1 (am) ura3-52</i><br>(DF5 background, wt)                  | Lab collection |
| FY0113 | <i>MAT his3-200 leu2-3, 112 lys2-801 trp1-1 (am) ura3-52</i><br>(DF5 background, wt)                   | Lab collection |
| FY1000 | <i>MATa ade2-1 can1-100 his3-11,-15 leu2-3,112 trp1-1 ura3-1</i><br><i>RAD5+</i> (W303 background, wt) | Lab collection |
| FY1060 | W303 Mata <i>sgs1 ::HisMX</i>                                                                          | This study     |
| FY1110 | W303 Mata <i>ura3::URA3/GPD-TK(7X)</i>                                                                 | Lab collection |
| FY1296 | <i>MATa ade2-1 can1-100 his3-11,-15 leu2-3,112 trp1-1 ura3-1</i><br><i>RAD5+</i> (W303 background, wt) | Lab collection |
| FY1487 | W303 Mata but <i>arg4 BglIII URA3::arg4 EcoRV::ura3-1 pol30-RR rad5-535</i>                            | Lab collection |
| FY1490 | DF5 Mata <i>ubc13 ::HPHNT1</i>                                                                         | Lab collection |
| FY1687 | W303 Mata <i>Hmo1-6PK::HIS3</i>                                                                        | Lab collection |
| HY0516 | DF5 Mat <i>rad5 ::HphMX4</i>                                                                           | Lab collection |
| HY0518 | DF5 Mat <i>mms2 ::HPHMX4</i>                                                                           | This study     |
| HY1507 | W303 Mata <i>hmo1 ::KanMX6</i>                                                                         | This study     |
| HY1508 | DF5 Mat <i>hmo1 ::KanMX6</i>                                                                           | This study     |
| HY1518 | DF5 Mat <i>rad5 ::HphMX4 hmo1 ::His3MX4</i>                                                            | This study     |
| HY1519 | DF5 Mat <i>mms2 ::HPHMX4 hmo1 ::His3MX6</i>                                                            | This study     |
| HY1976 | W303 Mata <i>ELG1-10FLAG::KanMX4</i>                                                                   | Lab collection |
| HY2003 | W303 Mata <i>elg1 ::KanMX</i>                                                                          | Lab collection |
| HY2174 | W303 Mata <i>ura3-1::ADH1-OsTIR1-9 Myc (URA3)</i><br><i>hmo1::hmo1-AID (KanMX4)</i>                    | This study     |
| HY2176 | W303 Mata <i>ura3-1::ADH1-OsTIR1-9 Myc (URA3)</i><br><i>hmo1::hmo1-aid(kanMX) sgs1 ::HPHMX4</i>        | This study     |
| HY2224 | DF5 Mata <i>rad17 ::HIS3</i>                                                                           | Lab collection |
| HY2651 | DF5 Mata <i>rad51 ::loxP-KANMX-loxP</i>                                                                | Lab collection |
| HY2682 | W303 Mat <i>rad5 ::HPHMX4</i>                                                                          | This study     |
| HY2706 | DF5 Mata <i>pol32 ::klTRP1 hmo1 ::KanMX6</i>                                                           | This study     |
| HY2714 | DF5 Mata <i>hmo1 ::KanMX6</i>                                                                          | This study     |

|               |                                                                                                   |                |
|---------------|---------------------------------------------------------------------------------------------------|----------------|
| <b>HY2719</b> | <b>DF5</b> Mata <i>pol32 ::klTRP1</i>                                                             | This study     |
| <b>HY3362</b> | <b>W303</b> Mata <i>top2-1</i>                                                                    | Lab collection |
| <b>HY3363</b> | <b>W303</b> Mata <i>top2-1 hmo1 ::His3MX4</i>                                                     | This study     |
| <b>HY3632</b> | <b>W303</b> Mata <i>rad5 ::HPHMX4 hmo1 ::HIS3</i>                                                 | This study     |
| <b>HY3633</b> | <b>W303</b> Mat <i>rad5 ::HPHMX4 hmo1 ::HisMX</i>                                                 | This study     |
| <b>HY3662</b> | <b>W303</b> Mata <i>hmo1 ::KanMX6</i>                                                             | This study     |
| <b>HY3664</b> | <b>W303</b> Mata <i>rad5 ::HPHMX4</i>                                                             | This study     |
| <b>HY3732</b> | <b>W303</b> Mata <i>hmo1-C 64::KanMX4</i>                                                         | This study     |
| <b>HY3735</b> | <b>W303</b> Mata <i>rad5 ::HPHMX4hmo1-C 64::KanMX4</i>                                            | This study     |
| <b>HY3800</b> | <b>W303</b> Mata <i>Rfa1-6PK::HIS3</i>                                                            | This study     |
| <b>HY3890</b> | <b>W303</b> Mata <i>top2-1 hmo1-C 64::KanMX4</i>                                                  | This study     |
| <b>HY3892</b> | <b>W303</b> Mata <i>top2-1 hmo1-C 22::KanMX4</i>                                                  | This study     |
| <b>HY3893</b> | <b>DF5</b> Mata <i>hmo1-C 64::KanMX4</i>                                                          | This study     |
| <b>HY3895</b> | <b>DF5</b> Mata <i>hmo1-C 22::KanMX4</i>                                                          | This study     |
| <b>HY3936</b> | <b>DF5</b> Mata <i>rad5 ::NATN2 rad17 ::HIS3</i>                                                  | This study     |
| <b>HY3939</b> | <b>DF5</b> Mata <i>rad5 ::NATN2 hmo1 ::KanMX4 rad17 ::HIS3</i>                                    | This study     |
| <b>HY3941</b> | <b>DF5</b> Mata <i>hmo1 ::KanMX4 rad17 ::HIS3</i>                                                 | This study     |
| <b>HY3943</b> | <b>DF5</b> Mat <i>rad5 ::NATN2 hmo1 ::KanMX4 rad51 ::URA3</i>                                     | This study     |
| <b>HY3944</b> | <b>DF5</b> Mat <i>rad5 ::NATN2 hmo1 ::KanMX4 ubc13 ::HPHMX</i>                                    | This study     |
| <b>HY3946</b> | <b>DF5</b> Mat <i>hmo1 ::KanMX4 rad51 ::URA3</i>                                                  | Lab collection |
| <b>HY3948</b> | <b>DF5</b> Mat <i>rad5 ::NATN2 rad51 ::URA3</i>                                                   | Lab collection |
| <b>HY3956</b> | <b>DF5</b> Mata <i>hmo1 ::KanMX4</i>                                                              | This study     |
| <b>HY3957</b> | <b>DF5</b> Mat <i>hmo1 ::KanMX4</i>                                                               | This study     |
| <b>HY3958</b> | <b>DF5</b> Mata <i>rad5 ::NATN2 ubc13 ::HPHMX</i>                                                 | This study     |
| <b>HY3959</b> | <b>DF5</b> Mat <i>hmo1 ::KanMX4 ubc13 ::HPHMX4</i>                                                | This study     |
| <b>HY3960</b> | <b>DF5</b> Mata <i>hmo1 ::KanMX4 ubc13 ::HPHMX4</i>                                               | This study     |
| <b>HY4017</b> | <b>W303</b> Mata <i>sgs1::pADH1-tc3-3xHA-Sgs1 (KanMX)</i>                                         | Lab collection |
| <b>HY4056</b> | <b>DF5</b> Mata <i>rad5 ::NATN2, elg1 ::HIS3</i>                                                  | This study     |
| <b>HY4073</b> | <b>DF5</b> Mata <i>rad5 ::NATN2, elg1 ::HIS3, hmo1 ::KanMX4</i>                                   | This study     |
| <b>HY4091</b> | <b>DF5</b> Mata <i>rad5 ::NATN2, hmo1-C 64::KanMX4</i>                                            | This study     |
| <b>HY4098</b> | <b>DF5</b> Mata <i>rad5 ::NATN2</i>                                                               | This study     |
| <b>HY4101</b> | <b>DF5</b> Mat <i>hmo1-C 64::KanMX4</i>                                                           | This study     |
| <b>HY4103</b> | <b>DF5</b> Mat                                                                                    | This study     |
| <b>HY4104</b> | <b>DF5</b> Mata <i>his3-delta200 leu2-3,112 lys2-801 trp1-1 (am) ura3-52 (DF5 background, wt)</i> | This study     |
| <b>HY4108</b> | <b>DF5</b> Mata <i>rad5 ::NATN2 hmo1-C 22::KanMX4</i>                                             | This study     |
| <b>HY4113</b> | <b>DF5</b> Mat <i>hmo1-C 22::KanMX4</i>                                                           | This study     |
| <b>HY4127</b> | <b>DF5</b> Mata <i>rad5 ::NATN2, hmo1 ::KanMX4</i>                                                | This study     |
| <b>HY4303</b> | <b>W303</b> Mata <i>sgs1 ::NATN2hmo1-C 64::KanMX4</i>                                             | This study     |
| <b>HY4320</b> | <b>W303</b> Mata <i>sgs1::pADH1-tc3-3xHA-Sgs1 (NATN2) elg1 ::KanMX4</i>                           | This study     |
| <b>HY4324</b> | <b>W303</b> Mata <i>S-Hmo1::natNT2</i>                                                            | This study     |
| <b>HY4325</b> | <b>W303</b> Mata <i>ura3-1::ADH1-OsTIR1-9 Myc (URA3) G2-</i>                                      | This study     |

*Hmo1::natNT2*

|               |                                                                                                  |                |
|---------------|--------------------------------------------------------------------------------------------------|----------------|
| <b>HY4352</b> | <b>W303</b> Mata <i>sgs1::pADH1-tc3-3xHA-Sgs1 (HPHMX4)</i><br><i>srs2::KANMX</i>                 | This study     |
| <b>HY4355</b> | <b>W303</b> Mata <i>S-Hmo1::natNT2 rad5::HPHMX4</i>                                              | This study     |
| <b>HY4359</b> | <b>W303</b> Mata <i>ura3-1::ADH1-OsTIR1-9 Myc (URA3) G2-</i><br><i>Hmo1::natNT2 rad5::HPHMX4</i> | This study     |
| <b>HY4416</b> | <b>DF5</b> Mata <i>rev3::HIS3</i>                                                                | This study     |
| <b>HY4417</b> | <b>DF5</b> Mata <i>ubc13::HPHMX4 rev3::HIS3</i>                                                  | This study     |
| <b>HY4439</b> | <b>DF5</b> Mat <i>hmo1::KanMX4 rev3::HIS3</i>                                                    | This study     |
| <b>HY4440</b> | <b>DF5</b> Mata <i>ubc13::HPHMX4 hmo1::KanMX4 rev3::HIS3</i>                                     | This study     |
| <b>IP1126</b> | <b>DF5</b> Mat <i>rad5::KanMX4, srs2::klTRP1, hmo1::KanMX4</i>                                   | This study     |
| <b>IP1128</b> | <b>DF5</b> Mat <i>rad5::KanMX4, hmo1::KanMX4</i>                                                 | This study     |
| <b>IP1130</b> | <b>DF5</b> Mat <i>srs2::klTRP1, hmo1::KanMX4</i>                                                 | This study     |
| <b>IP1136</b> | <b>DF5</b> Mat <i>hmo1::KanMX6 pol32::klTRP1</i>                                                 | This study     |
| <b>IP1138</b> | <b>DF5</b> Mat <i>hmo1::KanMX6 rad5::natNT2 pol32::klTRP1</i>                                    | This study     |
| <b>Y1223</b>  | <b>DF5</b> Mat <i>rad5::KanMX4</i>                                                               | Lab collection |
| <b>Y1572</b>  | <b>DF5</b> Mat <i>srs2::klTRP1</i>                                                               | Lab collection |
| <b>Y1576</b>  | <b>DF5</b> Mat <i>rad5::KanMX4, srs2::klTRP1</i>                                                 | Lab collection |
| <b>Y1630</b>  | <b>W303</b> Mata <i>siz1::His3MX6</i>                                                            | Lab collection |
| <b>Y2593</b>  | <b>DF5</b> Mat <i>pol32::klTRP1</i>                                                              | Lab collection |
| <b>Y2620</b>  | <b>DF5</b> Mata <i>ubc13::hphNT1</i>                                                             | Lab collection |
| <b>Y2663</b>  | <b>DF5</b> Mata <i>rad5::natNT2 pol32::klTRP1</i>                                                | Lab collection |
